# Supplementary material for: The frequency of single specific immunoglobulin E and allergen mixes with a MAST (multiple-antigen simultaneous test) technique
Source: publisher site journal article supplement (doi:10.1515/tjb-2024-0194), 2025-01-07
Supplement: Supplementary file 1 [file j_tjb-2024-0194_suppl_002.docx]

Table 1: Evaluation and interpretation of spIgE according to class category and related amount was given as kU/mL.

|  | **kU/mL** |  | **Allergen Class** |  | **Allergen-SpIgE Amount** |
| --- | --- | --- | --- | --- | --- |
|  | 1. - 0.34 |  | Class 0 |  | Not Found |
|  | 0.35 – 0.69 |  | Class 1 |  | Weak |
|  | 0.70 – 3.49 |  | Class 2 |  | Moderate |
|  | 3.50 – 17.49 |  | Class 3 |  | Moderately Strong |
|  | 17.50 – 49.99 |  | Class 4 |  | Strong |
|  | 50.00 – 99.99 |  | Class 5 |  | Very Strong |
|  | ≥ 100 |  | Class 6 |  | Extremely strong |

Table 5: The type of SpIgE not measured in the patient’s serum samples.

| **Allergen List** |  |  |  |
| --- | --- | --- | --- |
| - *Common Allergen Group* | Crab (f23) | Japanese cedar (t17) | - *Fish (shell) Group* |
| Soybean (f14) | Shrimp (f24) | Ox-eye daisy (w7) | Codfish (f3) |
| Alder (t2) | - *Pollen Group* | Dandelion (w8) | Lobster (f80) |
| Birch (t3) | Penicillium notatum (m1) | - *Animal Material Group* | Pacific squid (f58) |
| Japanese hop (w22) | Candida albicans (m5) | Mouse (e71) | - *Meat and Animal Products Group* |
| Mugwort (w6) | Maple leaf sycamore (t11) | Guinea pig (e6) | Silkworm pupa |
| Alternaria alternata (m6) | Cottonwood (t14) | Hamster (e84) | - *Other Group* |
| Cladosporium herbarum (m2) | White ash (t15) | Horse (e3) | Hevea latex (k82) |
| Aspergillus fumigatus (m3) | White pine (t16) | Rat (e73) |  |
